# Supplementary material for: The Effect of Single CpG Demethylation on the Pattern of DNA-Protein Binding
Source: MDPI journal article supplement (doi:10.3390/ijms20040914), 2019-02-20
Supplement: s1 [file s1]

**Table S1.** Genomic location of EDC regions examined by targeted NGS.

| Sequencing depth | Assay ID | Amplicon Location (GCRh37/hg19) | size |
|------------------|----------|---------------------------------|------|
| >30 x            | ADS5094  | Chr1:152163957-152164130        | 172  |
| >30 x            | ADS5106  | Chr1:152555752-152555979        | 228  |
| >30 x            | ADS5110  | Chr1:152732780-152733093        | 314  |
| >30 x            | ADS5113  | Chr1:152926868-152927147        | 280  |
| >30 x            | ADS5111  | Chr1:152939777-152940043        | 267  |
| >30 x            | ADS5095  | Chr1:153274856-153275087        | 236  |
| >30 x            | ADS5096  | Chr1:153277360-153277478        | 119  |
| >30 x            | ADS5097  | Chr1:153312802-153313011        | 210  |
| >30 x            | ADS5098  | Chr1:153320207-153320461        | 255  |
| >30 x            | ADS5099  | Chr1:153468125-153468417        | 293  |
| >30 x            | ADS5100  | Chr1:153520072-153520343        | 272  |
| >30 x            | ADS5101  | Chr1:153520796-153521007        | 213  |
| >30 x            | ADS5102  | Chr1:153521814-153522061        | 248  |
| >30 x            | ADS5103  | Chr1:153538200-153538487        | 288  |
| <10 x            | ADS5104  | Chr1:153538996-153539286        | 291  |
| >30x             | ADS5105  | Chr1:153540197-153540467        | 271  |
| >30 x            | ADS5112  | Chr1:153585466-153585611        | 146  |
| >30 x            | ADS5109  | Chr1:152973332-152973504        | 173  |
| >30 x            | ADS5107  | Chr1:152552991-152553285        | 228  |
| failed           | ADS5108  | Chr1:152880966-152881242        | 277  |
