# Supplementary material for: The Effect of Single CpG Demethylation on the Pattern of DNA-Protein Binding
Source: MDPI journal article supplement (doi:10.3390/ijms20040914), 2019-02-20
Supplement: s1 [file s1]

**Table S2.** List of proteins bound selectively to the unmethylated and methylated probes in four DAPA experiments.

| EXP 1        |            | EXP 2        |            | EXP 3        |            | EXP 4        |            |
|--------------|------------|--------------|------------|--------------|------------|--------------|------------|
| unmethylated | methylated | unmethylated | methylated | unmethylated | methylated | unmethylated | methylated |
| HIST1H1D     | RBBP7      | DDX39B       | TMPO       | ACTC1        | CTNNA2     | MCM4         | DES        |
| EEF1A2       | DDX5       | DEK          | PLEC       | LMNB2        | TUBB6      | RSBN1L       | ACADVL     |
| ACTA2        | MBD2       | RPS2         | EWSR1      | UQCRC1       | ACSL4      | HDGFL2       | HNRNPA3    |
| ANXA2        | ANXA2P2    | U2AF2        | DDX39A     | G3BP2        | SLC25A4    | POLR1C       | ATP1A1     |
| ATF1         | DSG1       | EPPK1        | DCD        | AP1B1        | INTS3      | KDM2A        | LRRC47     |
| PTBP1        | TMPO       | RPS6         | SEC31B     | SMARCC1      | DHX9       | CAPRIN1      | ACSL4      |
| RPLP0        | TCOF1      | RPS9         | RCC1       | KDM2A        | C14orf166  | UBTF         | ME2        |
| SOX15        | LRRC59     | PHB          |            | BCLAF1       | LEMD3      | RANBP1       | MTA2       |
| MAP4         | ACADVL     | CPSF6        |            | SEPT2        | RBBP4      | LMNA         | SLC1A3     |
| EIF2S1       | ITGA6      | SFPQ         |            | HCFC1        | ATP2A2     | MAX          | DDRKG1     |
| RECQL        | RPS6       | SLC25A5      |            | SRSF2        | FDFT1      | RPS20        | HMGNA4     |
| SRSF7        | ALKBH5     | H2AFZ        |            | NAT10        | CTTN       | ACTN4        | SEC61B     |
| SPTBN1       | FAU        | RPS7         |            | PTRH2        | UGT1A6     | U2AF2        | PHB        |
| MRPL12       | NACA       | CKAP4        |            | TOR1AIP2     | TAP1       | PRSS3        | CD3EAP     |
| SRSF8        | SRSF2      | RPLP0        |            | NDUFAB1      | NDUFAF1    | PRSS1        | PRSS2      |
| RPL27        | FLG        | HMGNA2       |            | DSG1         | DNAJA1     | NASP         | DTD1       |
| S100A7A      | SNRPD3     | MATR3        |            | CSTF2        | TBRG4      | POU2F1       | RBBP7      |
| SRSF6        | CCDC40     | RPS13        |            | TGM3         | MT         | PRPF19       | RPN1       |
| HNRNPAB      | KCNAB1     | TRIM28       |            | POLR2A       | XPO1       | HIST2H2BF    | TP63       |
| SPTAN1       | CALML5     | RPL27A       |            | MAPRE1       | RETSAT     | POLD3        | IMMT       |
| EPPK1        | LAD1       | TMPRSS13     |            | RPL10        | MTA1       | HRNR         | SUPT6H     |
| PLEC         | LETM1      | RPS10        |            | ITGB1        | PAF1       | AGRN         | LRPPRC     |
| SYNCRIP      | TADA2B     | SEC31A       |            | STAG2        | SCCPDH     | P4HB         | ACTN1      |
| RPS2         | TFAM       | CYFIP2       |            | ATP2A1       | ATP2B1     | C1QBP        | PNKP       |
| BCAP31       | AGPAT1     | SRSF9        |            | MRPL53       | RPS2       | SRSF10       | ATP2A2     |
| FTCDNL1      | KTN1       | HNRNPH1      |            | CSTF3        | MBOAT7     | DDX3X        | RPL27A     |
| IGHA1        | ATP5EP2    | MT-CO2       |            | NCAPH        | HADH       | SHMT2        | MIA3       |
| SLC25A5      | HIST1H2AG  | SNRPD1       |            | SEPT7        | NCLN       | MARCKS       | PSMC1      |
| RPL31        | ORC2       | RPS4X        |            | KIF5B        | KIF4A      | ANP32A       | BCAP31     |
| RPL34        | KIF4A      | CCDC25       |            | RBM3         | RPS18      | LIG1         | PAF1       |
| EBNA1BP2     | THEM6      | RPL7         |            | RPP30        | MBD2       | FLNA         | MT-CO2     |
| G3BP2        | RBM3       | RPL26L1      |            | PRMT5        | ZNF207     | FLNB         | DHX15      |
| RPL22        | USP39      | KATNAL2      |            | MRPL55       | IKBIP      | RPL12        | SSR4       |
| ACOT9        | GTF2F2     | RPL18        |            | LAMC1        | CLPX       | SRSF7        | POLR3A     |
| CANX         | HDAC1      | RPL12        |            | PPP1R7       | NDC1       | DDX17        | KIF4B      |
| TCERG1       | LSM3       | CALML5       |            | COPG1        | TMED10     | TFAP4        | H3F3C      |
| RPS12        | DHCR7      | SERBP1       |            | P4HA2        | ORC2       | AIMP1        | MORF4L2    |
| VRK1         | EFCAB14    | RPS17        |            | SMARCA5      | LPL        | DBT          | POLR3F     |
| FOXK1        | TRIM28     | RPL35        |            | TFG          | PBXIP1     | LSM3         | KPRP       |
| FAM223A      | ILF3       | SNRPF        |            | UBTF         | EDF1       | RPL13        | XP32       |
| ABCA12       | DDOST      | RPL31        |            | RCN2         | GCN1       | ACIN1        | FOXK1      |
| UBB          | HRNR       | RPLP1        |            | DTX3L        | TMEM109    | MRPL40       | SLC25A31   |
| FAM98B       |            | RPL6         |            | FUBP3        | FARSA      | ITGB4        | NONO       |
| RPL35A       |            | NUDT21       |            | LAD1         | ANO1       | RPL23A       | MGME1      |

|      |          |          |          |           |         |
|------|----------|----------|----------|-----------|---------|
| LRMP | HNRNPUL2 | STK25    | SF3B4    | TMPRSS11F | OGDH    |
|      | RPL13AP3 | MRPL2    | MRPL14   | DDX18     | S100A14 |
|      | RPL29    | WDR18    | SLC12A2  | DNAJC9    |         |
|      |          | PNN      | KIAA0391 | S100A9    |         |
|      |          | PSMA3    | FO XK1   | MRPS7     |         |
|      |          | STT3B    | PPP1CC   | RPS12     |         |
|      |          | LAMB3    | HYPK     | STIP1     |         |
|      |          | ARCN1    | PE       | GTF2F1    |         |
|      |          | XAB2     | TOR1AIP1 | SMC4      |         |
|      |          | SOX7     | DRAP1    | KIF22     |         |
|      |          | MRPS7    | SPTLC3   | RPS16     |         |
|      |          | SRSF3    | RPS20    | BASP1     |         |
|      |          | RPS15A   | BUD31    | PLCB3     |         |
|      |          | MYO18A   | SPCS2    | HNRNPAB   |         |
|      |          | TFB1M    | BRD3     | TRIM25    |         |
|      |          | RPL24    | RBM4     | RPS2      |         |
|      |          | RPL28    | RPS25    | RPS6      |         |
|      |          | LSM14B   | EIF3CL   | MATR3     |         |
|      |          | CSNK2A2  | SCD      | FAM47DP   |         |
|      |          | ACLY     | PDCD10   | API5      |         |
|      |          | RNF213   | MORF4L1  | RPL7A     |         |
|      |          | SCRIB    | MORF4L2  | C19orf53  |         |
|      |          | LRRC1    | SLC25A11 | DARS2     |         |
|      |          | PRPF3    | EXOC1    | SNRPD1    |         |
|      |          | PSMD6    | ALG9     | XRN2      |         |
|      |          | SMARCB1  | MLH1     |           |         |
|      |          | COLGALT1 | CHP1     |           |         |
|      |          | KHSRP    | RDH13    |           |         |
|      |          | TECR     | HELLS    |           |         |
|      |          | SPTLC2   | FAF2     |           |         |
|      |          | ZRANB2   | WDHD1    |           |         |
|      |          | USP28    | NR3C1    |           |         |
|      |          | MARS     | FANCI    |           |         |
|      |          | LARS     | POLR2E   |           |         |
|      |          | DDX47    | CAVIN3   |           |         |
|      |          | DDX24    | ZC3H11A  |           |         |
|      |          | FKBP4    | TPT1     |           |         |
|      |          | UHRF2    | GTF3C4   |           |         |
|      |          | NUP50    | KIF22    |           |         |
|      |          | AP2M1    | CYBA     |           |         |
|      |          | BAG6     | CRNKL1   |           |         |
|      |          | ARG1     | PBX2     |           |         |
|      |          | MRPL28   | HLA      |           |         |
|      |          | NOP9     | HLA      |           |         |
|      |          | SNU13    | EIF2AK2  |           |         |
|      |          | AGRN     | ATP5J    |           |         |
|      |          | AKAP8    | SRSF6    |           |         |
|      |          | PSMD8    | EMD      |           |         |
|      |          | ATRX     | MRPL21   |           |         |
|      |          | EXOSC10  | DENR     |           |         |

|          |          |
|----------|----------|
| CLPP     | RNASEH2B |
| UPF1     | GALNT3   |
| LLGL1    | NME1     |
| NHP2     | LPGAT1   |
| DDX50    | DUOX1    |
| NFYA     | LRWD1    |
| METTL15  | MRPL11   |
| SSR3     | DSG3     |
| KPNA5    | NAP1L4   |
| RAD23B   | FECH     |
| PSMA4    | ESYT2    |
| EPN1     | GNAS     |
| PSMB6    | ITGA3    |
| MRPL32   | LRRC41   |
| MRPL24   | OAS2     |
| NUP133   | MRPL50   |
| EIF5     | CNPY2    |
| PPP2CB   | PCDH1    |
| SRBD1    | LUC7L2   |
| RNF40    | LUC7L    |
| LYAR     | TOMM20   |
| APLP2    | FKBP11   |
| HOMEZ    | RPA3     |
| GLYR1    | LIMA1    |
| VASP     | ATP5J2   |
| IFIT5    | FAR1     |
| PPP1CB   | ALDH18A1 |
| WDR82    | TIMM50   |
| SMAP     | TSN      |
| AIMP1    | GALNT2   |
| FOXRED1  | NUSAP1   |
| RNPS1    | UQCC2    |
| RBM10    | XPA      |
| GTF3C1   | RCOR1    |
| TSNAX    | POGLUT1  |
| MAD1L1   | DHRS7    |
| STX5     | NDUFA9   |
| CCNK     | THUMPD1  |
| TERF2IP  | MRGBP    |
| RBM27    | TMEM205  |
| KIF11    | CORO1B   |
| EXOC2    | CLPB     |
| PKP1     | ELOB     |
| PBRM1    | SSBP1    |
| MRPS14   | BZW2     |
| RXRA     | PRSS3    |
| PABPN1   | MRPL17   |
| MRPL38   | SEC11A   |
| FIP1L1   | FADS1    |
| NIPSNAP1 | TP63     |

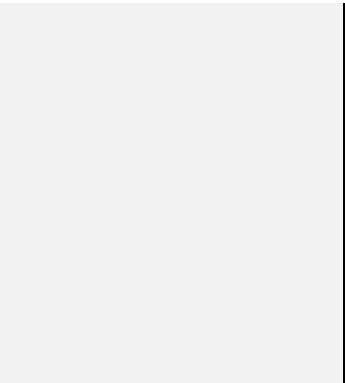

|         |          |
|---------|----------|
| BCKDHB  | SLC25A24 |
| ERMP1   | PSMB2    |
| RANGAP1 |          |
| MRPL16  |          |
| DIDO1   |          |
| GPD2    |          |
| VIRMA   |          |
| BRD4    |          |
| EXOSC2  |          |
| MRPL58  |          |
