# Supplementary figures and images for: The Effect of Single CpG Demethylation on the Pattern of DNA-Protein Binding
Source: MDPI journal article supplement (doi:10.3390/ijms20040914), 2019-02-20

chr1:153,297,862-153,310,718

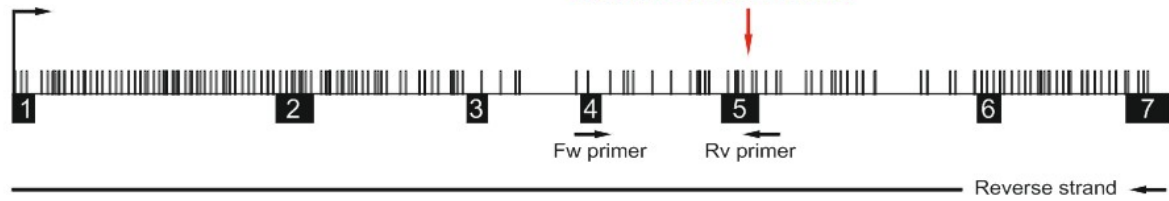

**Figure S1.** Schematic representation of *PGLYRP3*.

Supplement: s1 [file s1]
